# 1 **Held out wings RNA binding activity in the cytoplasm during early spermatogenesis**

2 Michaela Agapiou<sup>1,2</sup>, Tayah Hopes<sup>1,2</sup>, Fruzsina Hobor<sup>1,3</sup>, Amanda Bretman<sup>4</sup>, Thomas A.

3 Edwards<sup>1,3</sup> and Julie L. Aspden<sup>1,2</sup> #

4

5 <sup>1</sup> School of Molecular and Cellular Biology, Faculty of Biological Sciences, University of Leeds,  
6 LS2 9JT, UK.

7 <sup>2</sup> LeedsOmics, University of Leeds, UK

8 <sup>3</sup> Astbury Centre for Structural Molecular Biology, University of Leeds, Leeds, LS2 9JT, UK.

9 <sup>4</sup> School of Biology, Faculty of Biological Sciences, University of Leeds, LS2 9JT, UK

10 #corresponding author: [j.aspden@leeds.ac.uk](mailto:j.aspden@leeds.ac.uk)

11

## 12 Abstract

13 Held out wings (HOW) is an RNA-binding protein essential for spermatogenesis in *Drosophila*  
14 *melanogaster*. HOW is a signal transduction and activation of RNA (STAR) protein, regulating  
15 post-transcriptional gene expression. The characteristics of RNA-binding by the conserved  
16 short cytoplasmic isoform, HOW(S), are unknown. *In vivo* RIP-seq identified 121 novel  
17 transcripts bound by HOW(S) in germ stem cells and spermatogonia, many with signal  
18 transduction functions. (A/G/U)CUAAC motifs were enriched in 3'-UTRs and GCG(A/U)G in  
19 5'-UTRs. HOW binds with high-affinity to sites containing CUAAC motifs from *lola* and *hipk*  
20 mRNAs. This study provides new insight into STAR protein-RNA interactions and functions in  
21 spermatogenesis.

22

23

24

## 25 Introduction

26 Post-transcriptional gene regulation plays an essential role in stem cells contributing to  
27 pluripotency, differentiation and self-renewal. Molecular signals contribute to germ stem cell  
28 regulation through a variety of RNA processes controlled by a network of RNA-binding  
29 proteins including the signal transduction and activation of RNA (STAR) protein family. STAR  
30 proteins characteristically contain a single RNA-binding STAR domain, composed of one maxi-  
31 K-homology (KH) domain, and one or two flanking regions (Vernet & Artzt, 1997). As a result  
32 of their functions in signal transduction pathways, the family contributes to the regulation of  
33 gene expression during key stages of development. For example, the STAR protein Quaking  
34 (QKI) regulates RNA processing during gametogenesis and myelination in mammals (Kondo  
35 et al., 1999). RNA-binding proteins in general are important throughout spermatogenesis,  
36 including for stem cell maintenance and meiosis, across a variety of organisms (Legrand &  
37 Hobbs, 2018).

38  
39 Held out wings (HOW) is the ortholog of QKI in *Drosophila melanogaster*. HOW is essential  
40 but partial loss of function mutants exhibit a variety of phenotypes including defective wing  
41 development, glial maturation, tendon maturation and sterility (Baehrecke, 1997; Edenfeld  
42 et al., 2006; Monk et al., 2010; Nabel-Rosen et al., 1999). HOW regulates RNA processing,  
43 including pre-mRNA splicing, localisation and mRNA degradation (Graindorge et al., 2013;  
44 Nabel-Rosen et al., 2002; Rodrigues et al., 2012). There are multiple protein isoforms of HOW,  
45 produced through alternative splicing, all of which contain the STAR domain but differing at  
46 the C-terminus (Larkin et al., 2021). The different isoforms of QKI and HOW are differentially  
47 localised within cells, and the shortest isoforms, QKI-6 and HOW(S), are predominantly  
48 cytoplasmic, where their function is unknown. The HOW and QKI ortholog in *C. elegans*, GLD-

49 1, has a single cytoplasmic isoform that regulates mRNA translation in germ cells (Jan et al.,  
50 1999). Mirroring QKI's expression in mammals, HOW is expressed in *D. melanogaster* testis,  
51 and it is important during spermatogenesis (Monk et al., 2010). In germ cells, HOW's  
52 expression is unusual and highly restricted to the earliest stages of gametogenesis, where it  
53 contributes to the maintenance of germ stem cells (GSCs); without HOW, GSCs in the testis  
54 do not survive (Monk et al., 2011; Monk et al., 2010). Expression of HA-tagged HOW(S) in the  
55 testis indicates that this isoform is restricted to the cytoplasm in germ cells (Monk et al., 2010).  
56 The restricted expression of HOW during spermatogenesis suggests a specific function in  
57 regulating the balance between stem cell maintenance versus the proliferation and  
58 differentiation of spermatogonia.

59

60 The majority of work on HOW thus far has focused on HOW(L) and its role in nuclear RNA  
61 processing events. Current understanding of HOW RNA binding comes from a handful of  
62 mRNAs (e.g. *dpp*, *miple1*, *bam*), which contain 3'-UTR ACUAA motifs typically bound by  
63 HOW(L) (Israeli et al., 2007). The only mRNA previously known to be bound specifically by  
64 HOW(S) rather than HOW(L) is *dgrasp* in oocytes (Giuliani et al., 2014). An optimal binding  
65 preference has yet to be characterised for HOW but a consensus of NCUAACN has been  
66 generated from *in vitro* binding experiments (Ray et al., 2013). Here, we sought to globally  
67 identify novel mRNA targets of HOW in the testis, specifically by HOW(S) in the cytoplasm, to  
68 understand the binding characteristic of this interaction *in vivo*.

69

70

71

72

73 Results & Discussion

74 **Expression and pull-down of cytoplasmic HA-tagged HOW(S) in testis germ cells**

75 To understand the role of HOW(S) and the RNAs it binds in the cytoplasm, HA-tagged HOW(S)  
76 was expressed in the early stages of spermatogenesis in *Drosophila melanogaster* testes. This  
77 was achieved by using the UAS/GAL4 system, whereby HOW(S)-HA expression was driven by  
78 *nanos*-GAL4, and thus, HOW(S)-HA was expressed in GSCs and early spermatogonia (Fig. 1A).  
79 This HA-tagged HOW(S) is localised to the cytoplasm of these cells (Fig. 1A), recapitulating the  
80 presence of cytoplasmic HOW in these specific germ cells (Monk et al., 2011; Monk et al.,  
81 2010). We were able to successfully pull down HOW(S)-HA from the lysates of these testes  
82 using anti-HA beads (Fig. 1B). To isolate RNA bound to HOW(S), RNP-IPs were performed from  
83 large scale testes lysates in triplicate (Fig. 1C and Supplemental Fig. 1A-C). RNA from the  
84 HOW(S)-HA pull-down was purified along with RNA from input testis lysates and RNA from  
85 pull-downs performed from the *nanos*-GAL4 parent testes, which had no HA-tagged HOW(S)  
86 (Supplemental Fig. 1D). These RNA samples then underwent RNA-seq.

87

88

89

90

91

92

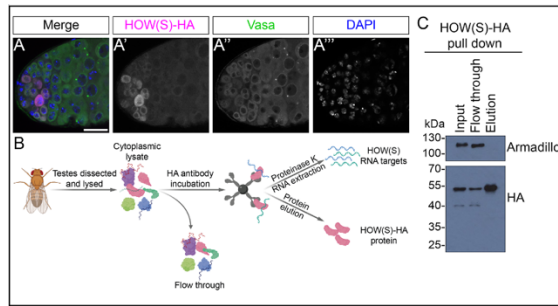

93

94 Figure 1: Expression and pull-down of HA-tagged HOW(S) from cytoplasm of germ cells

95 A) Confocal images showing cytoplasmic expression of HOW(S)-HA (magenta) in GSCs and

96 spermatogonia, driven by the nanos-GAL4 line. Germ cells are positive for vasa (green), and

97 blue is DAPI. B) Schematic of HOW(S)-HA RIP-seq. C) Western blot showing specific depletion

98 of HOW(S)-HA from testis the input lysate and enrichment in the elution using anti-HA

99 beads.

100

### 101 **HOW(S) bound RNAs are enriched for signalling functions**

102 To identify which RNAs were specifically bound to HOW(S)-HA, differential transcript

103 enrichment analysis was performed on RNAs in HOW(S)-HA pulldown compared to those

104 present in input lysate (Fig. 2A, Supplemental Table 1, Supplemental Fig. 2A-B). The majority

105 of transcripts showed no enrichment, having a  $\log_2(\text{Fold Change})$  between -0.5 and 0.5 (Fig.

106 2B). We defined enriched transcripts as those with a  $\log_2(\text{Fold Change}) \geq 1$  and an FDR-

107 corrected  $p$ -value  $\leq 0.05$ . Through this analysis we identified 403 transcripts enriched in the

108 HOW(S)-HA pull-down RNA compared with input RNA. Non-specific background RNAs

109 enriched in the parental *nanos*-GAL4 RIP-seq sample (with no HOW(S)-HA present) were then

110 subtracted, leaving those RNA transcripts specifically bound to HOW(S)-HA. 121 mRNAs were

111 identified as specifically enriched by HOW(S) RIP-seq (Fig. 2C – green dots). To understand the

112 role of the RNAs bound by HOW(S), GO analysis was performed on the genes corresponding

113 to these HOW(S) bound mRNAs. This revealed an enrichment for genes with functions in cell  
114 signalling, specifically in cell communication and signal transduction e.g. *hipk* (homeodomain  
115 interacting protein kinase) and *CycG* (cyclin G) (Fig. 2D, Supplemental Fig. 2C). This is entirely  
116 consistent with HOW's membership of the STAR family of proteins.

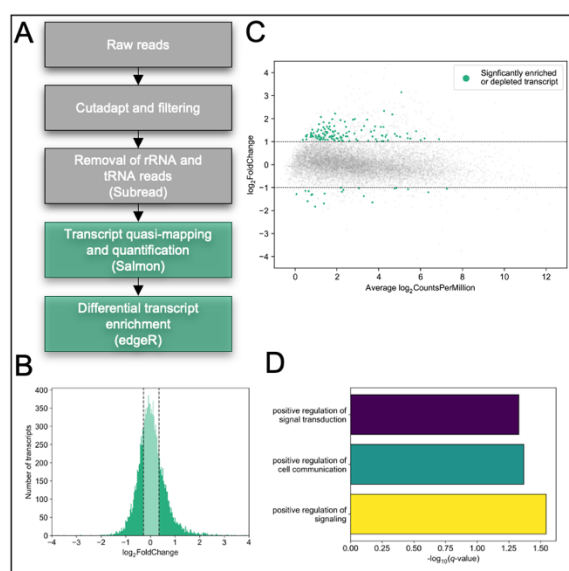

117  
118 **Figure 2: Enrichment of HOW(S) bound RNA, with role in signal transduction**  
119 *A) Pipeline to identify RNAs specifically bound to HOW(S). B) Histogram from differential*  
120 *enrichment analysis of pull-down versus input, middle quartiles are shaded in lighter green.*  
121 *C) Scatter plot from differential transcript analysis. Significantly enriched or depleted*  
122 *transcripts are those with log<sub>2</sub>(Fold Change) of ≥ 1 or ≤ -1 (dotted lines), and an FDR-*  
123 *corrected p-value ≤ 0.05, additionally non-specific background RNAs enriched in the parental*  
124 *nanos-GAL4 RIP-seq sample were subtracted. Significantly enriched or depleted RNAs from*  
125 *the HOW(S) RIP-seq are highlighted in green. D) GO term analysis reveals over-*  
126 *representation of signaling related terms in transcripts bound by HOW(S).*

127  
128 HOW's ortholog QKI is a known regulator of circRNA processing (Conn et al., 2015),  
129 and while our method was not optimised for circRNA detection, further analysis revealed a

130 small number of circRNAs in our dataset, some of which HOW(S) may bind (Supplemental Fig.  
131 2D and Supplemental Table 2).

132

### 133 **CUAAC motif enriched in 3'-UTRs of HOW(S) bound RNAs**

134 To determine the nature of HOW(S) binding to the 121 transcripts identified by RIP-seq, motif  
135 analysis was performed on these mRNA targets. Within the 3'-UTRs the most enriched motif  
136 was found to be (A/G/U)CUAAC (Fig. 3A), with 46% of the HOW(S)-HA bound mRNAs  
137 containing this motif (Fig. 3B). (A/G/U)CUAAC is very similar to the other previously identified  
138 HOW binding sequence in *stripe* and *dpp* mRNAs: ACUAA (Israeli et al., 2007). Rather than  
139 characterising a small number of HOW targets and identifying individual binding sites, the  
140 (A/G/U)CUAAC motif generated here is from a much larger number of RNAs bound by HOW(S)  
141 in the cytoplasm.

142

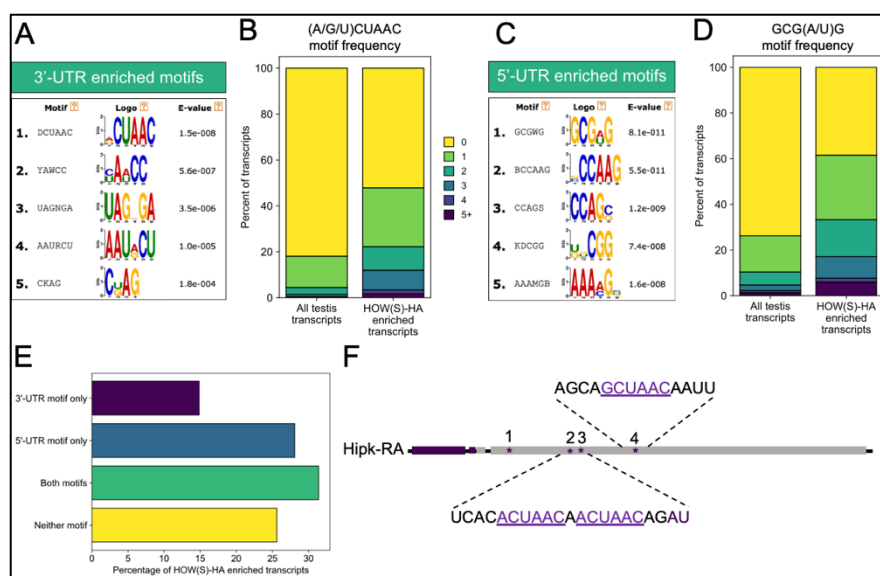

143

144 **Figure 3: Enrichment of CUAAC motifs in HOW(S) bound RNAs**

145 *A) Motifs found to be enriched in 3'-UTRs of mRNAs bound by HOW(S). B) Frequency at*  
 146 *which (A/G/U)CUAAC motif identified in 3'-UTR of HOW(S) bound transcripts compared to*  
 147 *the 3'-UTRs of all testis expressed transcripts. C) Motifs found to be enriched in 5'-UTRs of*  
 148 *mRNAs bound by HOW(S). D) Frequency at which GCG(A/U)G motif identified in 5'-UTR of*  
 149 *HOW(S) bound transcripts compared to the 5'-UTRs of all testis expressed transcripts. E)*  
 150 *Percentage of transcripts bound by HOW(S) that had either of the top UTR motifs, both, or*  
 151 *neither in their respective UTRs. F) Schematic of the 3' end of *hipk* transcript, purple is CDS,*  
 152 *grey is UTR, and asterisks mark (A/G/U)CUAAC sites in the 3'-UTR.*

153

154 Other distinct motifs were found enriched in the 5'-UTRs of HOW(S) bound mRNAs,  
 155 including GCG(A/U)G (Fig. 3C), but these do not show similarity with previously identified  
 156 HOW binding sites (Graindorge et al., 2013; Israeli et al., 2007; Ray et al., 2013). Although  
 157 these are unlikely to be HOW(S) binding sites, because their sequence differs dramatically  
 158 from the previously characterised ACUAA motif, these motifs may be important for HOW(S)  
 159 RNA-protein complexes as they are highly enriched in the HOW(S) bound mRNAs – the



160 GCG(A/U)G motif is present in 60% of HOW(S) bound mRNAs (Fig. 3D). Instead, these motifs  
161 may represent sequences that are bound to another RNA-binding protein (RBP) associated  
162 with HOW(S), since RIP-seq will identify both indirect and direct interactions. This type of co-  
163 binding has been demonstrated for HOW(L), which can interact with the RBP SXL, with the  
164 two proteins binding distinct sequences in the 5'-UTR of *msl-2* (Graindorge et al., 2013). We  
165 also observed that 31% of HOW(S) bound mRNAs contain enriched motifs both in their 5'-  
166 and 3'-UTRs (Fig. 3E), which indicates that HOW(S) molecules could bind in both UTRs of an  
167 mRNA transcript simultaneously, potentially regulating the mRNA in numerous ways. This has  
168 been shown for other RBPs during development e.g. SXL during sex determination (Duncan  
169 et al., 2006).

170 Further analysis of the HOW(S) bound transcripts that have the (A/G/U)CUAAC motif  
171 reveals that 21% of them contain multiple repeats of this motif, which is substantially higher  
172 than that found in all testis expressed transcripts (Fig. 3B). RBPs often bind RNAs in a modular  
173 manner, and HOW, along with many of the STAR proteins, dimerise (Nir et al., 2012). Thus,  
174 multiple binding sites in HOW(S) bound transcripts could indicate a modular binding mode.  
175 This pattern is also seen for the top 5'-UTR enriched motif GCG(A/U)G (Fig. 3D), indicating  
176 that this too may represent a modular RBP binding region.

177 One such mRNA which has multiple predicted binding sites is *hipk*. Hipk protein  
178 functions in multiple signalling pathways, including Notch (Lee et al., 2009), Hippo (Chen &  
179 Verheyen, 2012; Poon et al., 2012), and the JAK-STAT pathway (Tettweiler et al., 2019) and is  
180 essential for germline development in *C. elegans* and mouse spermatogenesis (Berber et al.,  
181 2013; Crapster et al., 2020). *Hipk-RA* transcript (FBtr0072552) was identified as enriched in  
182 the HOW(S)-HA RIP-seq and contains four (A/G)CUAAC sites within its 3'-UTR (Fig. 3F),

183 therefore likely represents a key HOW(S) target with downstream roles in signalling pathways  
184 essential in maintaining the stem cell niche and cell fate.

185

186 **Recombinant HOW-STAR domain binds enriched motifs within HOW(S) bound RNAs with**  
187 **high affinity**

188 To test the binding of HOW to the motifs identified as enriched from RIP-seq we  
189 recombinantly expressed HOW's STAR domain (Fig. 4A, Supplemental Fig. 3A-C) and  
190 performed fluorescence anisotropy (FA) binding assays. Three different mRNAs that we  
191 identified as being bound by HOW(S) in GSCs and early spermatogonia were selected to test  
192 HOW binding to sequences from within these transcripts that were identified as highly similar  
193 to the enriched motifs.

194

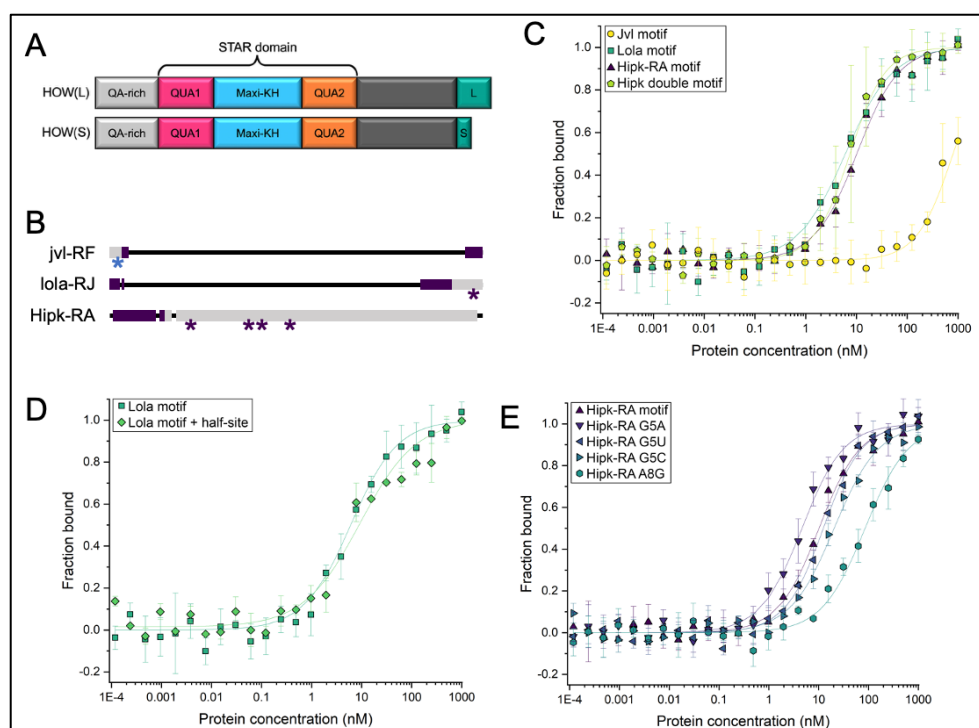

195

196 Figure 4: HOW KH domain binds to HOW(S) targets with high affinity and specificity

197 A) Schematic of two HOW protein isoforms, indicating recombinant protein STAR domain

198 expressed. B) Schematic of three transcripts bound by HOW(S): the 5' end of *jvl*-RF, and 3'

199 ends of *lola*-RF and *Hipk*-RA. Asterisks mark the 5'-UTR (blue) and 3'-UTR (purple) motifs.

200 Purple bars are CDS, grey is UTRs. C) FA binding plots from *jvl* motif, *lola* motif and *Hipk*-RA

201 motif, as well as the *Hipk* double site. D) *lola* motif and *lola* motif + half-site. E) Mutations in

202 the *Hipk*-RA motif.

203

204 A site was selected from the 5'-UTR of *jvl* transcript (FBtr0305694) that contained the

205 most highly enriched 5'-UTR motif within HOW(S) bound mRNAs: GCGUG (Fig. 4B). FA analysis

206 of this *jvl* RNA oligo revealed that HOW-STAR did not bind to this site in the low nanomolar

207 range (Fig. 4C & Table 1). This suggests that although the GCG(A/U)G motif is highly enriched

208 in the 5'-UTRs of HOW(S) bound mRNAs, it is unlikely to be an *in vivo* HOW(S) binding site. An

209 alternative explanation could be that HOW(S) interacts with a second RBP, which provides the

210 RNA-binding specificity for these interactions. One potential candidate is SLIRP1 protein,  
211 which has a binding motif that is highly similar to the one found in the 5'-UTR of HOW(S)  
212 bound RNAs: GCG(U/C)(G>A/C/U) (Ray et al., 2013) and is highly expressed in the testis.

213

| Oligo name             | Sequence                                 | Apparent $K_D$<br>(nM) to 3 sig.<br>fig. | Standard<br>error ( $\pm$ ) |
|------------------------|------------------------------------------|------------------------------------------|-----------------------------|
| Jvl motif              | GUUG <u>GCGUG</u> UUUU                   | 803                                      | 1064                        |
| Lola motif             | ACAC <u>ACUAAC</u> UCGU                  | 6.05                                     | 0.62                        |
| Lola motif + half-site | ACAC <u>ACUAAC</u> UCGU <u>AACUA</u> AUG | 9.25                                     | 1.57                        |
| Hipk-RA motif          | AGCAG <u>CUAAC</u> AAUU                  | 10.1                                     | 0.73                        |
| Hipk-RA G5A            | AGCA <u>ACUAAC</u> AAUU                  | 4.65                                     | 0.56                        |
| Hipk-RA G5U            | AGCA <u>UCUAAC</u> AAUU                  | 12.4                                     | 1.25                        |
| Hipk-RA G5C            | AGCA <u>CCUAAC</u> AAUU                  | 20.4                                     | 2.86                        |
| Hipk-RA A8G            | AGCAG <u>CUGAC</u> AAUU                  | 85.3                                     | 22.1                        |
| Hipk double motif      | UACA <u>ACUAAC</u> <u>AACUAAC</u> AGAU   | 7.46                                     | 1.76                        |

214 **Table 1: Summary of HOW binding affinities for HOW(S) predicted binding sites**

215 *Sequence of oligos based on the predicted binding sites within HOW(S) targets, along with*  
216 *apparent  $K_D$  and standard error calculated from FA. Sequences that match the top motifs from*  
217 *the motif enrichment analysis are underlined, and nucleotides mutated are in bold.*

218

219 We also tested RNA oligos based on regions from *lola* and *hipk*, two transcripts bound  
220 by HOW(S), which contain sequences matching the 3'-UTR HOW(S) motif. The *lola* element  
221 contains an ACUAAC motif and HOW-STAR exhibits high affinity binding to this RNA oligo by  
222 FA (Fig. 4C, Supplemental Fig. 3D). Just downstream of this motif is a potential half-site and  
223 such half-sites have been suggested to enable stronger binding by STAR proteins (Galarneau  
224 & Richard, 2009). However, the RNA oligo including this additional half-site did not increase

225 the affinity of HOW-STAR for the HOW binding site (Fig. 4D & Table 1). Therefore, we focused  
226 simply on HOW(S) binding sites with a complete motif.

227 Multiple sites were found in Hipk-RA mRNA that match the 3'-UTR enriched motif, so  
228 we characterised the binding of HOW(S) to RNA oligos containing the sequences of two of  
229 these regions (Fig. 3F). The first site contains GCUAAC and exhibits high affinity binding (10.1  
230 +/- 0.73 nM) with HOW-STAR (Fig. 4C). Our motif enrichment analysis indicated that the first  
231 position of the top 3'-UTR motif, (A/G/C)CUAAC, appeared to be the most flexible (Fig 3A).  
232 Therefore, the G from this GCUAAC site was mutated to A, C or U, and binding tested to  
233 understand the effect on HOW-STAR binding affinity in the context of the same 14mer oligo  
234 used in these FA experiments. This revealed that there is a preference for adenosine at this  
235 site over guanosine, uridine and cytidine (Fig. 4E & Table 1). This is consistent with the motif  
236 enrichment analysis, where adenosine is more commonly found compared with other  
237 nucleotides (Fig. 3A). To show specificity of HOW binding to these NCUAAC motifs, the  
238 adenosine in the fourth position was mutated to a guanosine, which resulted in a large  
239 decrease (approximately 20 fold vs ACUAAC) in HOW-STAR binding affinity (Fig. 4E; Table 1).  
240 This is also consistent with the mutational analysis performed on HOW's binding site in  
241 *stripe's* 3'-UTR, which can be bound by either HOW(S) or HOW(L) (Israeli et al., 2007).

242 The second Hipk-RA site contains two HOW(S) motifs in close proximity in the 3'-UTR.  
243 The binding of HOW-STAR with this region, the Hipk 'double site', was of very similar affinity  
244 to the site only containing one CUAAC motif, suggesting that only a monomer of HOW is  
245 binding to this region, rather than dimer (Fig. 4C, Table 1). Other STAR proteins can bind as  
246 dimers and this may be the case for HOW but at more distant sites than those within this  
247 'double site' (Table 1), although avidity effects may also be in play here.

248 Overall, we have identified 121 novel targets of cytoplasmic HOW(S) in testis germ  
249 cells, several of which are involved in signal transduction. Within these HOW(S) bound RNAs  
250 the (A/G/U)CUAAC motif is enriched in 3'-UTRs and GCG(A/U)G in 5'-UTRs. This 3'-UTR motif  
251 is similar to potential HOW binding sites identified in *stripe* and *dpp* mRNAs, as well the  
252 consensus sequences of other STAR proteins. The STAR domain of HOW has strong  
253 (nanomolar  $K_D$ ) affinity for RNA elements containing the CUAAC motif from *lola* and *hipk*  
254 mRNAs but not with GCG(A/U)G 5'-UTR motif. Together these results provide new insight into  
255 STAR protein-RNA interactions and potential importance to spermatogenesis. Given the  
256 importance of HOW to germ stem cells, understanding these novel cytoplasmic protein-RNA  
257 networks and their functional consequences will shed new light on how the balance of self-  
258 renewal and differentiation is regulated in stem cells.

259

## 260 Methods

### 261 **Fly husbandry and stocks**

262 Flies were kept in a 25°C humidified room with a 12:12 hour light:dark cycle and raised on  
263 10ml standard sugar-yeast-agar medium (Bass et al., 2007). Crosses were generated by  
264 collecting unmated flies, then 5-10 flies of each sex were placed into a vial together with  
265 grains of active baker's yeast. UAS-HOW-S-HA line generously gifted by Prof T. Volk, *nanos*-  
266 GAL4 line used is #64277 from BDSC.

267

### 268 **Immunofluorescence**

269 Testes from 0-3 day old unmated flies were fixed with 4% paraformaldehyde and stained  
270 sequentially with anti-vasa then anti-HA. Slides were imaged using a Zeiss LSM880 Upright

271 Confocal Microscope with the 40X oil-immersion objective and Zen imaging software. See  
272 the Supplemental Methods for details regarding tissue dissection, staining and antibodies.

273

#### 274 **Ribonucleoprotein immunoprecipitation**

275 1000 pairs of testes from 0–3 day old flies (mated or unmated) were dissected per sample.

276 RIP pull-downs were adapted from (Keene et al., 2006), for full details see the Supplemental

277 Methods.

278

#### 279 **Sequencing and computational analysis**

280 The RNA from the lysates and elutions of three HOW(S)-HA pull-downs and one *nanos*-GAL4

281 parental control pull-down was prepared using the Ribo-Zero rRNA Removal Kit (Illumina)

282 followed by the TruSeq Stranded Total RNA Library Prep (Illumina), sequencing was 75 bp

283 single-end. Differential transcript enrichment was carried out using edgeR, and motif

284 enrichment with DREME. See Supplemental Methods for details regarding sequencing,

285 filtering, mapping, and analyses.

286

#### 287 **Data availability**

288 RIP-seq data have been deposited to the Gene Expression Omnibus with accession ID:

289 GSE201319.

290

#### 291 **Protein expression and purification**

292 Residues 72–266 of *D. melanogaster* HOW (the STAR domain) was expressed in BL21(DE3)

293 cells with a His<sub>6</sub>-GST tag and purified via affinity chromatography and size exclusion

294 chromatography. See Supplemental Methods for additional protein expression and  
295 purification details.

296

### 297 **Fluorescence anisotropy**

298 RNA oligonucleotides were 3' labelled with 6-carboxyfluorescein and mixed with purified  
299 STAR protein, the top protein concentration was 1 nM. See Supplemental Methods for assay  
300 and calculation details.

301

### 302 Funding

303 MA was funded from BBSRC DTP, BB/M011151/1. JA was funded by the University of Leeds  
304 (University Academic Fellow scheme).

305

### 306 Competing Interest Statement

307 Authors have no competing interests.

308

### 309 Acknowledgments

310 We thank the Next Generation Sequencing facility, at St James University Hospital, Leeds, UK  
311 for performing Next Generation Sequencing. Parts of this work were undertaken on ARC3,  
312 part of the High Performance Computing facilities at the University of Leeds, UK. We thank  
313 the Protein Production Facility, especially Dr Brian Jackson. We also thank the Imaging Facility,  
314 Faculty of Biological Sciences, University of Leeds, UK for their assistance in confocal  
315 microscopy. We also thank the Biomolecular Mass Spectrometry Facility, University of Leeds,  
316 UK for their assistance.

317



318 Author contributions

319 MA conceived, designed and performed experiments for the study. FH performed  
320 experiments for the study. TH performed experiments for the study. AB conceived the work,  
321 interpreted data, drafted and revised the manuscript. TE conceived the work, interpreted  
322 data, drafted and revised the manuscript. JLA conceived the work, interpreted data, drafted  
323 and revised the manuscript. All authors contributed to manuscript writing, revision and have  
324 approved the submitted version.

325

326

327 References

328

329 Baehrecke, E. H. (1997). who encodes a KH RNA binding protein that functions in muscle  
330 development. *Development*, 124(7), 1323-1332.

331 Bass, T. M., Grandison, R. C., Wong, R., Martinez, P., Partridge, L., & Piper, M. D. W. (2007).  
332 Optimization of dietary restriction protocols in *Drosophila*. *Journals of Gerontology -*  
333 *Series A Biological Sciences and Medical Sciences*, 62(10), 1071-1081.

334 <https://doi.org/10.1093/gerona/62.10.1071>

335 Berber, S., Llamosas, E., Thaivalappil, P., Boag, P. R., Crossley, M., & Nicholas, H. R. (2013).  
336 Homeodomain interacting protein kinase (HPK-1) is required in the soma for robust  
337 germline proliferation in *C. elegans*. *Developmental Dynamics*, 242(11), 1250-  
338 1261. <https://doi.org/10.1002/dvdy.24023>

339 Chen, J., & Verheyen, E. M. (2012). Homeodomain-interacting protein kinase regulates  
340 yorkie activity to promote tissue growth. *Current Biology*, 22(17), 1582-1586.

341 <https://doi.org/10.1016/j.cub.2012.06.074>

- 342 Conn, S. J., Pillman, K. A., Toubia, J., Conn, V. M., Salmanidis, M., Phillips, C. A., . . . Goodall,  
343 G. J. (2015). The RNA binding protein quaking regulates formation of circRNAs. *Cell*,  
344 *160*(6), 1125-1134. <https://doi.org/10.1016/j.cell.2015.02.014>
- 345 Crapster, J. A., Rack, P. G., Hellmann, Z. J., Le, A. D., Adams, C. M., Leib, R. D., . . . Chen, J. K.  
346 (2020). HIPK4 is essential for murine spermiogenesis. *eLife*, *9*, e50209-e50209.  
347 <https://doi.org/10.7554/eLife.50209>
- 348 Duncan, K., Grskovic, M., Strein, C., Beckmann, K., Niggeweg, R., Abaza, I., . . . Hentze, M. W.  
349 (2006). Sex-lethal imparts a sex-specific function to UNR by recruiting it to the msl-2  
350 mRNA 3' UTR: translational repression for dosage compensation. *Genes Dev*, *20*(3),  
351 368-379. <https://doi.org/10.1101/gad.371406>
- 352 Edenfeld, G., Volohonsky, G., Krukkert, K., Naffin, E., Lammel, U., Grimm, A., . . . Klämbt, C.  
353 (2006). The splicing factor crooked neck associates with the RNA-binding protein  
354 HOW to control glial cell maturation in *Drosophila*. *Neuron*, *52*(6), 969-980.  
355 <https://doi.org/10.1016/j.neuron.2006.10.029>
- 356 Galarneau, A., & Richard, S. (2009). The STAR RNA binding proteins GLD-1, QKI, SAM68 and  
357 SLM-2 bind bipartite RNA motifs. *BMC Molecular Biology*, *10*(47), doi:10.1186/1471-  
358 2199-1110-1147. <https://doi.org/10.1186/1471-2199-10-47>
- 359 Giuliani, G., Giuliani, F., Volk, T., & Rabouille, C. (2014). The *Drosophila* RNA-binding  
360 protein HOW controls the stability of *dgrasp* mRNA in the follicular  
361 epithelium. *Nucleic Acids Research*, *42*(3), 1970-1986.  
362 <https://doi.org/10.1093/nar/gkt1118>
- 363 Graindorge, A., Carré, C., & Gebauer, F. (2013). Sex-lethal promotes nuclear retention of  
364 *msl2* mRNA via interactions with the STAR protein HOW. *Genes &*  
365 *Development*, *27*(12), 1421-1433. <https://doi.org/10.1101/gad.214999.113>

- 366 Israeli, D., Nir, R., & Volk, T. (2007). Dissection of the target specificity of the RNA-binding  
367 protein HOW reveals dpp mRNA as a novel HOW target. *Development*, 134(11),  
368 2107-2114. <https://doi.org/10.1242/dev.001594>
- 369 Jan, E., Motzny, C. K., Graves, L. E., & Goodwin, E. B. (1999). The STAR protein, GLD-1, is a  
370 translational regulator of sexual identity in *Caenorhabditis elegans*. *The EMBO*  
371 *Journal*, 18(1), 258-269.
- 372 Keene, J. D., Komisarow, J. M., & Friedersdorf, M. B. (2006). RIP-Chip: The isolation and  
373 identification of mRNAs, microRNAs and protein components of ribonucleoprotein  
374 complexes from cell extracts. *Nature Protocols*, 1(1), 302-307.  
375 <https://doi.org/10.1038/nprot.2006.47>
- 376 Kondo, T., Furuta, T., Mitsunaga, K., Ebersole, T. A., Shichiri, M., Wu, J., . . . Abe, K. (1999).  
377 Genomic organization and expression analysis of the mouse qkl locus. *Mammalian*  
378 *Genome*, 10(7), 662-669. <https://doi.org/10.1007/s003359901068>
- 379 Larkin, A., Marygold, S. J., Antonazzo, G., Attrill, H., Dos Santos, G., Garapati, P. V., . . .  
380 Consortium, F. (2021). FlyBase: updates to the *Drosophila melanogaster* knowledge  
381 base. *Nucleic Acids Res*, 49(D1), D899-D907. <https://doi.org/10.1093/nar/gkaa1026>
- 382 Lee, W., Andrews, B. C., Faust, M., Walldorf, U., & Verheyen, E. M. (2009). Hipk is an  
383 essential protein that promotes Notch signal transduction in the *Drosophila* eye by  
384 inhibition of the global co-repressor Groucho. *Developmental Biology*, 325(1), 263-  
385 272. <https://doi.org/10.1016/j.ydbio.2008.10.029>
- 386 Legrand, J. M. D., & Hobbs, R. M. (2018). RNA processing in the male germline: Mechanisms  
387 and implications for fertility. *Seminars in Cell and Developmental Biology*, 79, 80-91.  
388 <https://doi.org/10.1016/j.semcd.2017.10.006>

- 389 Monk, A. C., Siddall, N. A., Fraser, B., McLaughlin, E. A., & Hime, G. R. (2011). Differential  
390 roles of HOW in male and female *Drosophila* germline differentiation. *PLoS ONE*,  
391 6(12), e28508-e28508. <https://doi.org/10.1371/journal.pone.0028508>
- 392 Monk, A. C., Siddall, N. A., Volk, T., Fraser, B., Quinn, L. M., McLaughlin, E. A., & Hime, G. R.  
393 (2010). HOW Is Required for Stem Cell Maintenance in the *Drosophila* Testis and for  
394 the Onset of Transit-Amplifying Divisions. *Cell Stem Cell*, 6(4), 348-360.  
395 <https://doi.org/10.1016/j.stem.2010.02.016>
- 396 Nabel-Rosen, H., Dorevitch, N., Reuveny, A., & Volk, T. (1999). The balance between two  
397 isoforms of the *Drosophila* RNA-binding protein How controls tendon cell  
398 differentiation. *Molecular Cell*, 4(4), 573-584. [https://doi.org/10.1016/S1097-](https://doi.org/10.1016/S1097-2765(00)80208-7)  
399 [2765\(00\)80208-7](https://doi.org/10.1016/S1097-2765(00)80208-7)
- 400 Nabel-Rosen, H., Volohonsky, G., Reuveny, A., Zaidel-Bar, R., & Volk, T. (2002). Two isoforms  
401 of the *Drosophila* RNA binding protein, How, act in opposing directions to regulate  
402 tendon cell differentiation. *Developmental Cell*, 2(2), 183-193.  
403 [https://doi.org/10.1016/S1534-5807\(01\)00118-6](https://doi.org/10.1016/S1534-5807(01)00118-6)
- 404 Nir, R., Grossman, R., Paroush, Z. e., & Volk, T. (2012). Phosphorylation of the *Drosophila*  
405 melanogaster RNA-binding protein HOW by MAPK/ERK enhances its dimerization  
406 and activity. *PLoS Genetics*, 8(3), e1002632-e1002632.  
407 <https://doi.org/10.1371/journal.pgen.1002632>
- 408 Poon, C. L. C., Zhang, X., Lin, J. I., Manning, S. A., & Harvey, K. F. (2012). Homeodomain-  
409 interacting protein kinase regulates Hippo pathway-dependent tissue growth.  
410 *Current Biology*, 22(17), 1587-1594. <https://doi.org/10.1016/j.cub.2012.06.075>

- 411 Ray, D., Kazan, H., Cook, K. B., Weirauch, M. T., Najafabadi, H. S., Li, X., . . . Hughes, T. R.  
412 (2013). A compendium of RNA-binding motifs for decoding gene regulation. *Nature*,  
413 499(7457), 172-177. <https://doi.org/10.1038/nature12311>
- 414 Rodrigues, F., Thuma, L., & Klämbt, C. (2012). The regulation of glial-specific splicing of  
415 Neurexin IV requires HOW and Cdk12 activity. *Development*, 139(10), 1765-1776.  
416 <https://doi.org/8223268>
- 417 Teplova, M., Hafner, M., Teplov, D., Essig, K., Tuschl, T., & Patel, D. J. (2013). Structure-  
418 function studies of STAR family Quaking proteins bound to their in vivo RNA target  
419 sites. *Genes & Development*, 27(8), 928-940.  
420 <https://doi.org/10.1101/gad.216531.113>
- 421 Tettweiler, G., Blaquiére, J. A., Wray, N. B., & Verheyen, E. M. (2019). Hipk is required for  
422 JAK/STAT activity during development and tumorigenesis. *PLoS One*, 14(12),  
423 e0226856. <https://doi.org/10.1371/journal.pone.0226856>
- 424 Vernet, C., & Artzt, K. (1997). STAR, a gene family involved in signal transduction and  
425 activation of RNA. *Trends in Genetics*, 13(12), 479-484.  
426 [https://doi.org/10.1016/S0168-9525\(97\)01269-9](https://doi.org/10.1016/S0168-9525(97)01269-9)
- 427  
428  
429  
430  
431  
432  
433
